# Supplementary material
Source: PubMed Central journal article supplement (PMC7963979)
Supplement: 1865_table.pdf [file 1865_table.pdf]

**On-line Table. Baseline clinical data, intervention, clinical, and angiographic outcomes**

| No.            | Occlusion Site                   | Cause                | Adjunctive Medication            | Recapture, Period from Deployment to Attempt (min) | Baseline TIMI | Post-Tx TIMI | Baseline NIHSS | Discharge NIHSS |
|----------------|----------------------------------|----------------------|----------------------------------|----------------------------------------------------|---------------|--------------|----------------|-----------------|
| 1              | ICA terminus to A1 and M1, left  | Cardioembolic        | UK, 100,000 U; tirofiban, 0.5 mg | Failed (180)                                       | 0             | 3            | 22             | 0               |
| 2              | ICA terminus to A1 and M1, left  | Cardioembolic        | UK, 100,000 U; tirofiban, 0.5 mg | Failed (120)                                       | 0             | 3            | 23             | 20              |
| 3              | ICA terminus to M1, left         | Traumatic dissection | UK, 100,000 U; tirofiban, 0.5 mg | No attempt                                         | 0             | 3            | 3→10           | 1               |
| 4              | ICA terminus to A1 and M1, right | Cardioembolic        | UK, 100,000 U; tirofiban, 1 mg   | Failed (150)                                       | 0             | 3            | 18             | 3               |
| 5              | ICA terminus to A1 and M1, right | Cardioembolic        | UK, 200,000 U                    | Successful (20)                                    | 0             | 2            | 13             | 0               |
| 6              | BA terminus                      | Cardioembolic        | UK, 100,000 U; tirofiban 1 mg    | Successful (30)                                    | 0             | 2            | 14             | 0               |
| 7              | M1 to M2, right                  | Cardioembolic        | UK, 100,000 U; tirofiban, 1 mg   | Failed (120)                                       | 0             | 2            | 21             | 15              |
| 8 <sup>a</sup> | M1, right                        | Embolic, ICA to MCA  | UK, 300,000 U                    | Successful (15)                                    | 0             | 2            | 15             | 0               |
| 9              | M1 to M2, right                  | Cardioembolic        | Tirofiban, 0.5 mg                | No attempt                                         | 0             | 2            | 17             | 3               |

<sup>a</sup>This case was published as Suh et al.<sup>9</sup>
